# Supplementary material for: Size and orientation of polar nanoregions characterized by PDF analysis and using a statistical model in a Bi(Mg1/2Ti1/2)O3–PbTiO3 ferroelectric re-entrant relaxor
Source: Royal Society of Chemistry journal article supplement (doi:10.1039/d4ta00240g), 2024-01-01
Supplement: d4ta00240g1.pdf [file d4ta00240g1.pdf]

## Size and orientation of PNRs characterized by PDF analysis and a statistical model in

### $\text{Bi}(\text{Mg}_{1/2}\text{Ti}_{1/2})\text{O}_3\text{-PbTiO}_3$ ferroelectric re-entrant relaxor

Laijun Liu<sup>1</sup>, Kaiyuan Chen<sup>1,2</sup>, Dawei Wang<sup>3</sup>, Manuel Hinterstein<sup>4,11</sup>, Anna-Lena Hansen<sup>4</sup>, Michael Knapp<sup>4</sup>, Biaolin Peng<sup>5</sup>, Xianran Xing<sup>6</sup>, Yuanpeng Zhang<sup>7</sup>, Jing Kong<sup>8</sup>, Abhijit Pramanick<sup>8</sup>, Mads Ry Vogel Jørgensen<sup>9</sup>, Frederick Marlton<sup>10\*</sup>

<sup>1</sup>Guangxi Key Laboratory of Optical and Electronic Materials and Devices, Guilin University of Technology, Guilin 541004, China

<sup>2</sup>BCMaterials, Basque center for materials Application & Nanostructures, UPV/EHU Science Park, Leioa 48940, Spain

<sup>3</sup>School of Microelectronics, Xi'an Jiaotong University, Xi'an 710049, China

<sup>4</sup>Institute for Applied Materials (IAM), Karlsruhe Institute of Technology, 76131 Karlsruhe, Germany

<sup>5</sup>School of Advanced Materials and Nanotechnology, Xi'dian University, Xi'an 710071, China

<sup>6</sup>Department of Physical Chemistry, University of Science and Technology Beijing, Beijing, 100083, China

<sup>7</sup>Neutron Scattering Division, Oak Ridge National Laboratory, Oak Ridge, Tennessee 37831, United States

<sup>8</sup>Department of Materials Science and Engineering, City University of Hong Kong, Hong Kong, China

<sup>9</sup>Department of Chemistry and iNANO, Aarhus University, 8000 Aarhus C, Denmark; MAX IV Laboratory, Lund University, SE-221 00 Lund, Sweden

<sup>10</sup>School of Mathematical and Physical Sciences, The University of Technology Sydney, Sydney, NSW 2007, Australia

<sup>11</sup>Fraunhofer IWM, 79108 Freiburg, Germany

### Supplementary Information

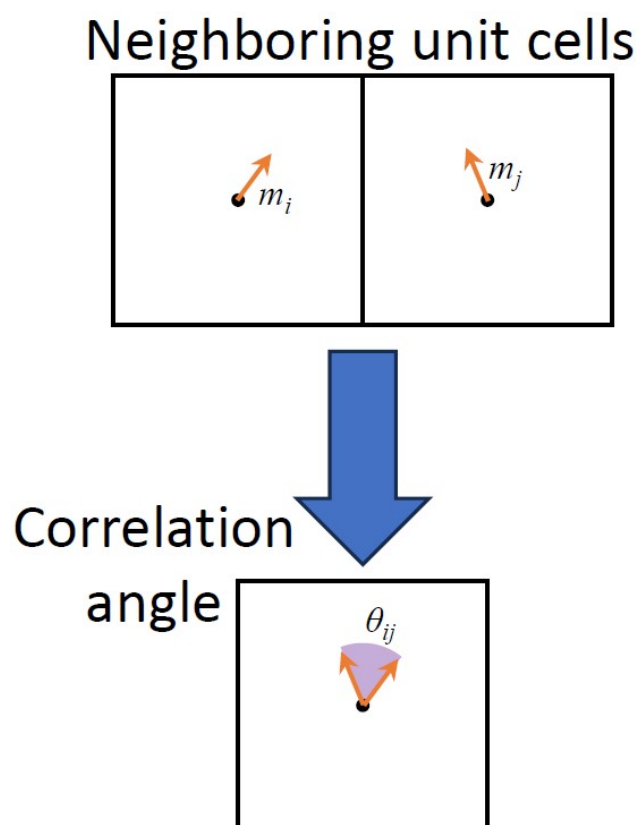

Figure S1: Illustration of the calculation of angular correlations for nearest neighbors in two dimensions.  $m_i$  and  $m_j$  correspond to the displacement vectors describing atom-atom pair  $i$  and  $j$ .  $\theta_{ij}$  is the angle formed between the directions of the two displacement vectors.

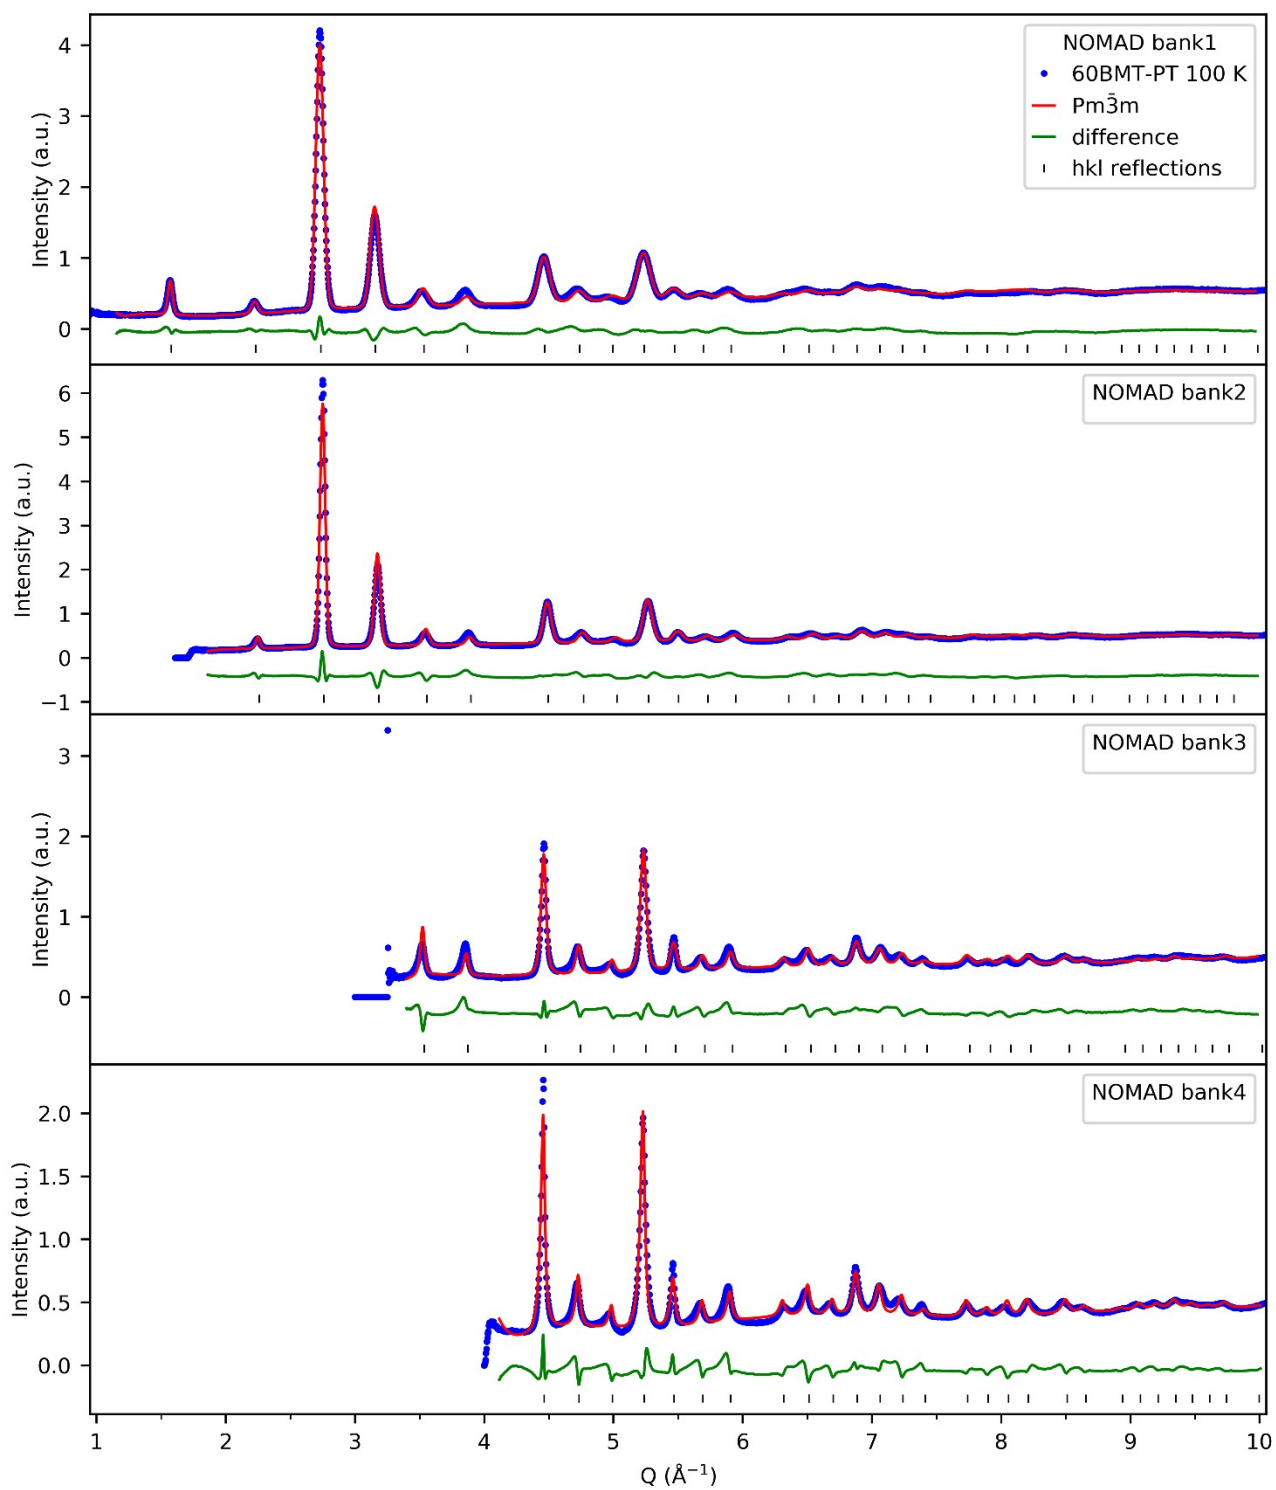

Figure S2 Neutron powder diffraction Rietveld refinement fit of 60BMT-PT at 100 K with a  $Pm\bar{3}m$  cubic unit cell.

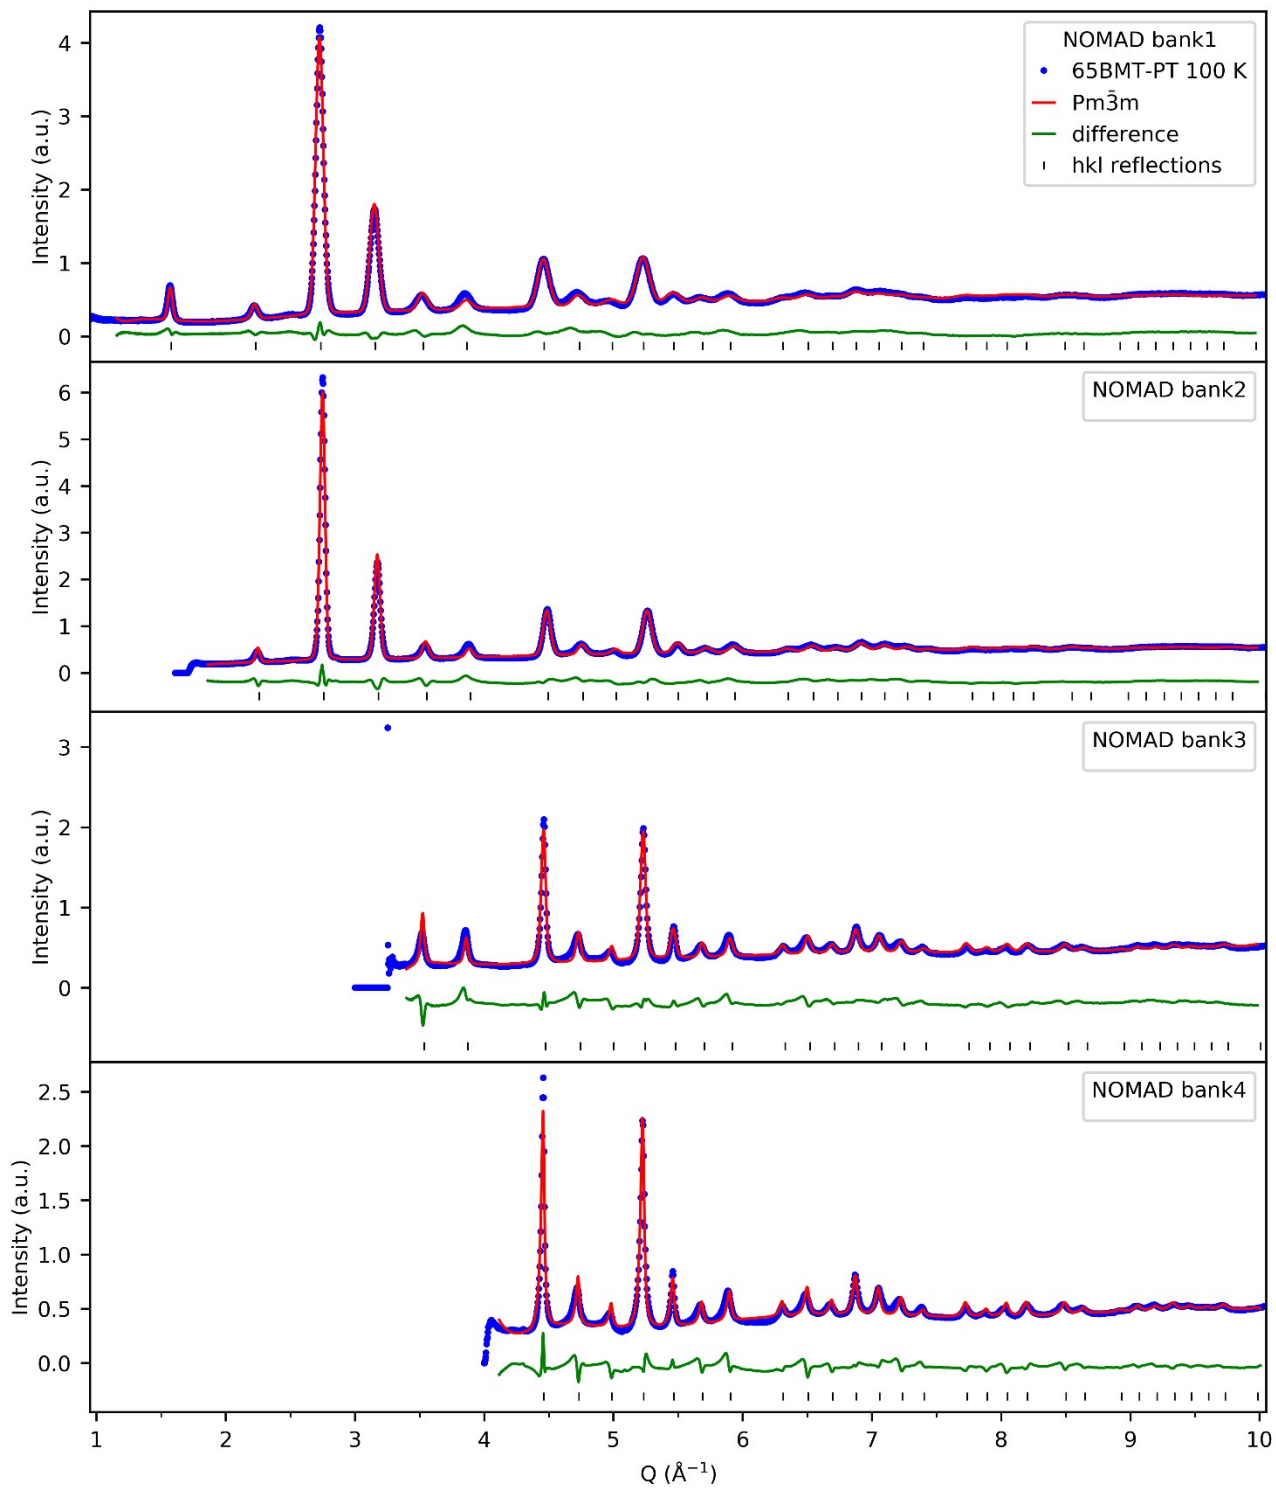

Figure S3 Neutron powder diffraction Rietveld refinement fit of 65BMT-PT at 100 K with a  $Pm\bar{3}m$  cubic unit cell.

Table S1 Rietveld refinement results for 60BMT-PT and 65BMT-PT using different models

| Sample        | Space group   | Cell parameter                       |                                     | <i>R</i> value       |                       |                      |
|---------------|---------------|--------------------------------------|-------------------------------------|----------------------|-----------------------|----------------------|
|               |               | <i>a</i> , <i>b</i> and <i>c</i> (Å) | $\alpha$ , $\beta$ and $\gamma$ (°) | <i>R<sub>p</sub></i> | <i>R<sub>wp</sub></i> | <i>R<sub>e</sub></i> |
| 65BMT-PT      | <i>Pm-3m</i>  | 3.9896                               | 90                                  | 17.2                 | 16.7                  | 0.145                |
|               | <i>P4mm</i>   | 3.9759, 4.0293                       | 90                                  | 10.3                 | 11.5                  | 0.126                |
|               | <i>R3m</i>    | 5.6436, 6.9093                       | 90, 90, 120                         | 16.7                 | 18.4                  | 0.147                |
|               | <i>Pm-3m+</i> | 3.9836                               | 90                                  | 6.87                 | 6.39                  | 0.141                |
|               | <i>R3m</i>    | 5.6582, 6.9281                       | 90, 90, 120                         |                      |                       |                      |
|               | <i>Pm-3m+</i> | 3.9734                               | 90                                  | 8.12                 | 9.42                  | 0.134                |
|               | <i>P4mm</i>   | 3.9745, 4.0362                       | 90                                  |                      |                       |                      |
|               | 60BMT-PT      | <i>Pm-3m</i>                         | 3.9873                              | 90                   | 9.97                  | 9.26                 |
| <i>P4mm</i>   |               | 3.9700, 4.0391                       | 90                                  | 9.21                 | 10.6                  | 0.133                |
| <i>R3m</i>    |               | 5.6398, 6.9071                       | 90, 90, 120                         | 16.9                 | 17.0                  | 0.156                |
| <i>Pm-3m+</i> |               | 3.9873                               | 90                                  | 13.5                 | 12.1                  | 0.156                |
| <i>R3m</i>    |               | 5.6517, 6.9276                       | 90, 90, 120                         |                      |                       |                      |
| <i>Pm-3m+</i> |               | 3.9999                               | 90                                  | 6.92                 | 7.45                  | 0.136                |
| <i>P4mm</i>   |               | 3.9681, 4.0383                       | 90                                  |                      |                       |                      |

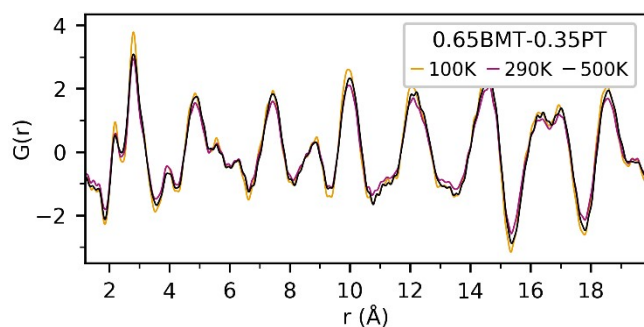

Figure S4 Neutron pair distribution function of 65BMT-PT.

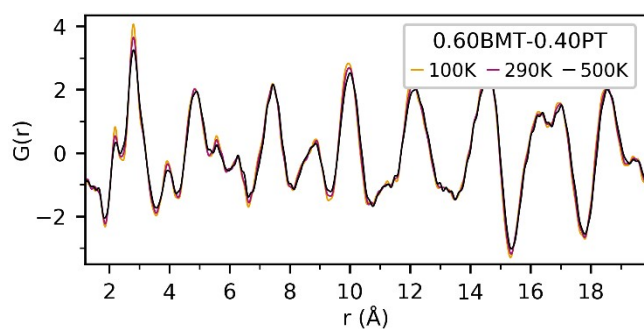

Figure S5 Neutron pair distribution function of 60BMT-PT.

## Stereographic projections

For a directional perspective, stereographic projections were produced from the directional atomic displacements. The displacement vectors were determined, and their angles relative to the [001] and [100] cubic directions were calculated and binned into “windows” on the stereograph of an equal solid angle. The brightness of the perceptually uniform color scale indicates the relative number of directional displacements in each angular “window”.

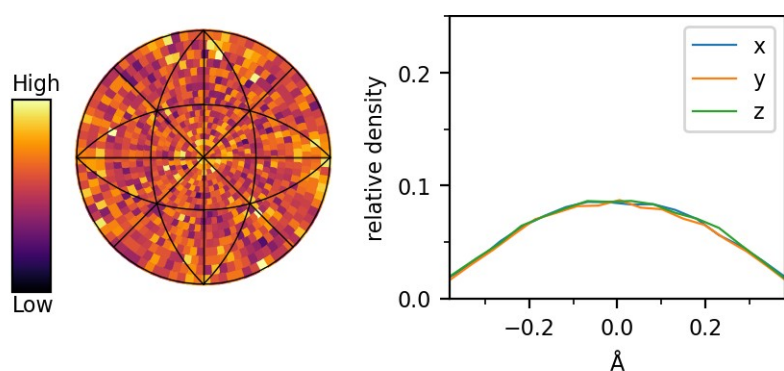

Figure S6 The directional displacement of Bi plotted on a stereographic projection (left). Histograms of the  $x,y$  and  $z$  displacements (right).

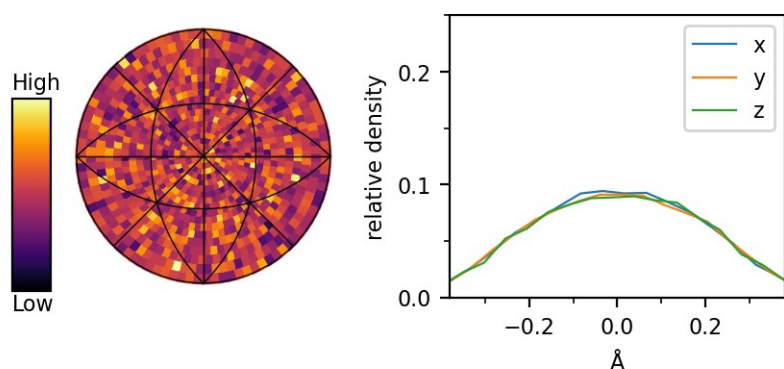

Figure S7 The directional displacement of Pb plotted on a stereographic projection (left). Histograms of the  $x,y$  and  $z$  displacements (right).

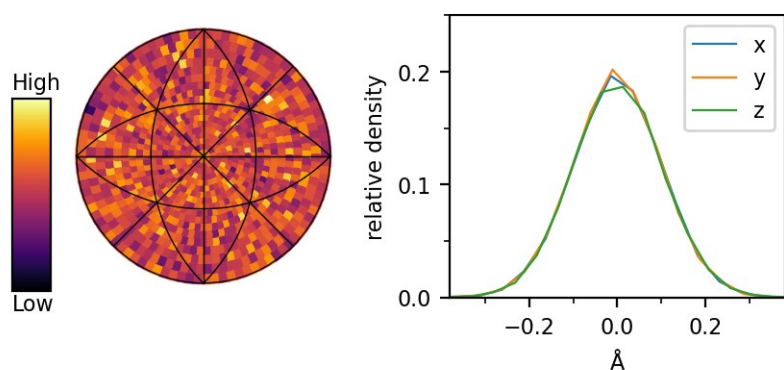

Figure S8 The directional displacement of Ti plotted on a stereographic projection (left). Histograms of the  $x,y$  and  $z$  displacements (right).

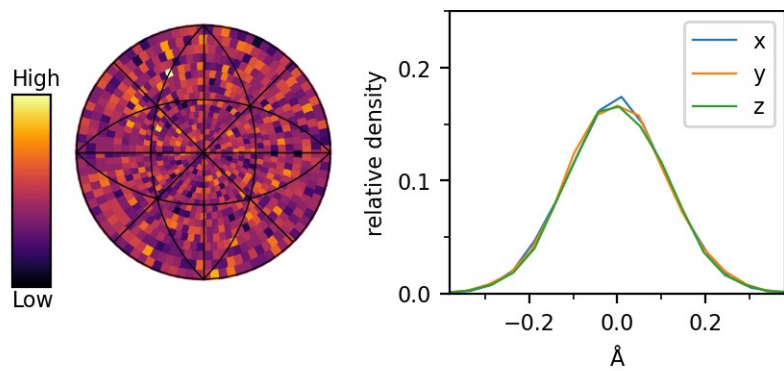

Figure S9 The directional displacement of Mg plotted on a stereographic projection (left). Histograms of the  $x$ ,  $y$  and  $z$  displacements (right).
